# Supplementary material
Source: Springer Nature journal article supplement (https://mijn.bsl.nl/resource/supplementary/13047_2013_598_MOESM1_ESM.pdf/7112936)
Supplement: MOESM1 [file 7112936]

|                                         | <b>Clinic A</b>                                                                                                   | <b>Clinic B</b>                                                                                           |
|-----------------------------------------|-------------------------------------------------------------------------------------------------------------------|-----------------------------------------------------------------------------------------------------------|
| Pain relief                             | <i>A noticeable improvement</i> in lower limb pain                                                                | <i>No change</i> in the levels of pain experienced                                                        |
| Improvement in mobility                 | Ability to <i>move freely</i> without limitations                                                                 | <i>A noticeable improvement</i> in the ability to move but some limitations                               |
| Activities of daily living              | <i>No improvement in ability</i> to take part in usual everyday activities (dependent on others)                  | Ability to take part in <i>all usual everyday activities</i> with no limitations (completely independent) |
| Route to podiatry care (foot care)      | The hospital appointment includes seeing the consultant, the podiatrist and the physiotherapist in the same visit | The consultant would decide whether to refer you/your child to a separate appointment with the podiatrist |
| Waiting time for first podiatry contact | Three months                                                                                                      | Six months                                                                                                |
| Footwear type                           | Ability to wear <i>specially made</i> customised/ bespoke/orthopaedic shoes only                                  | Ability to wear <i>most types of shoes</i> such as dress shoes/football boots                             |
| Cost to you                             | £150                                                                                                              | £220                                                                                                      |

*Which clinic would you prefer (tick one box only)?*

Prefer Clinic A

☐

Prefer Clinic B

☐

Neither

☐
